# Supplementary material
Source: Springer Nature journal article supplement (https://www.springermedizin.de/resource/supplementary/12874_2011_583_MOESM2_ESM.pdf/9432562)

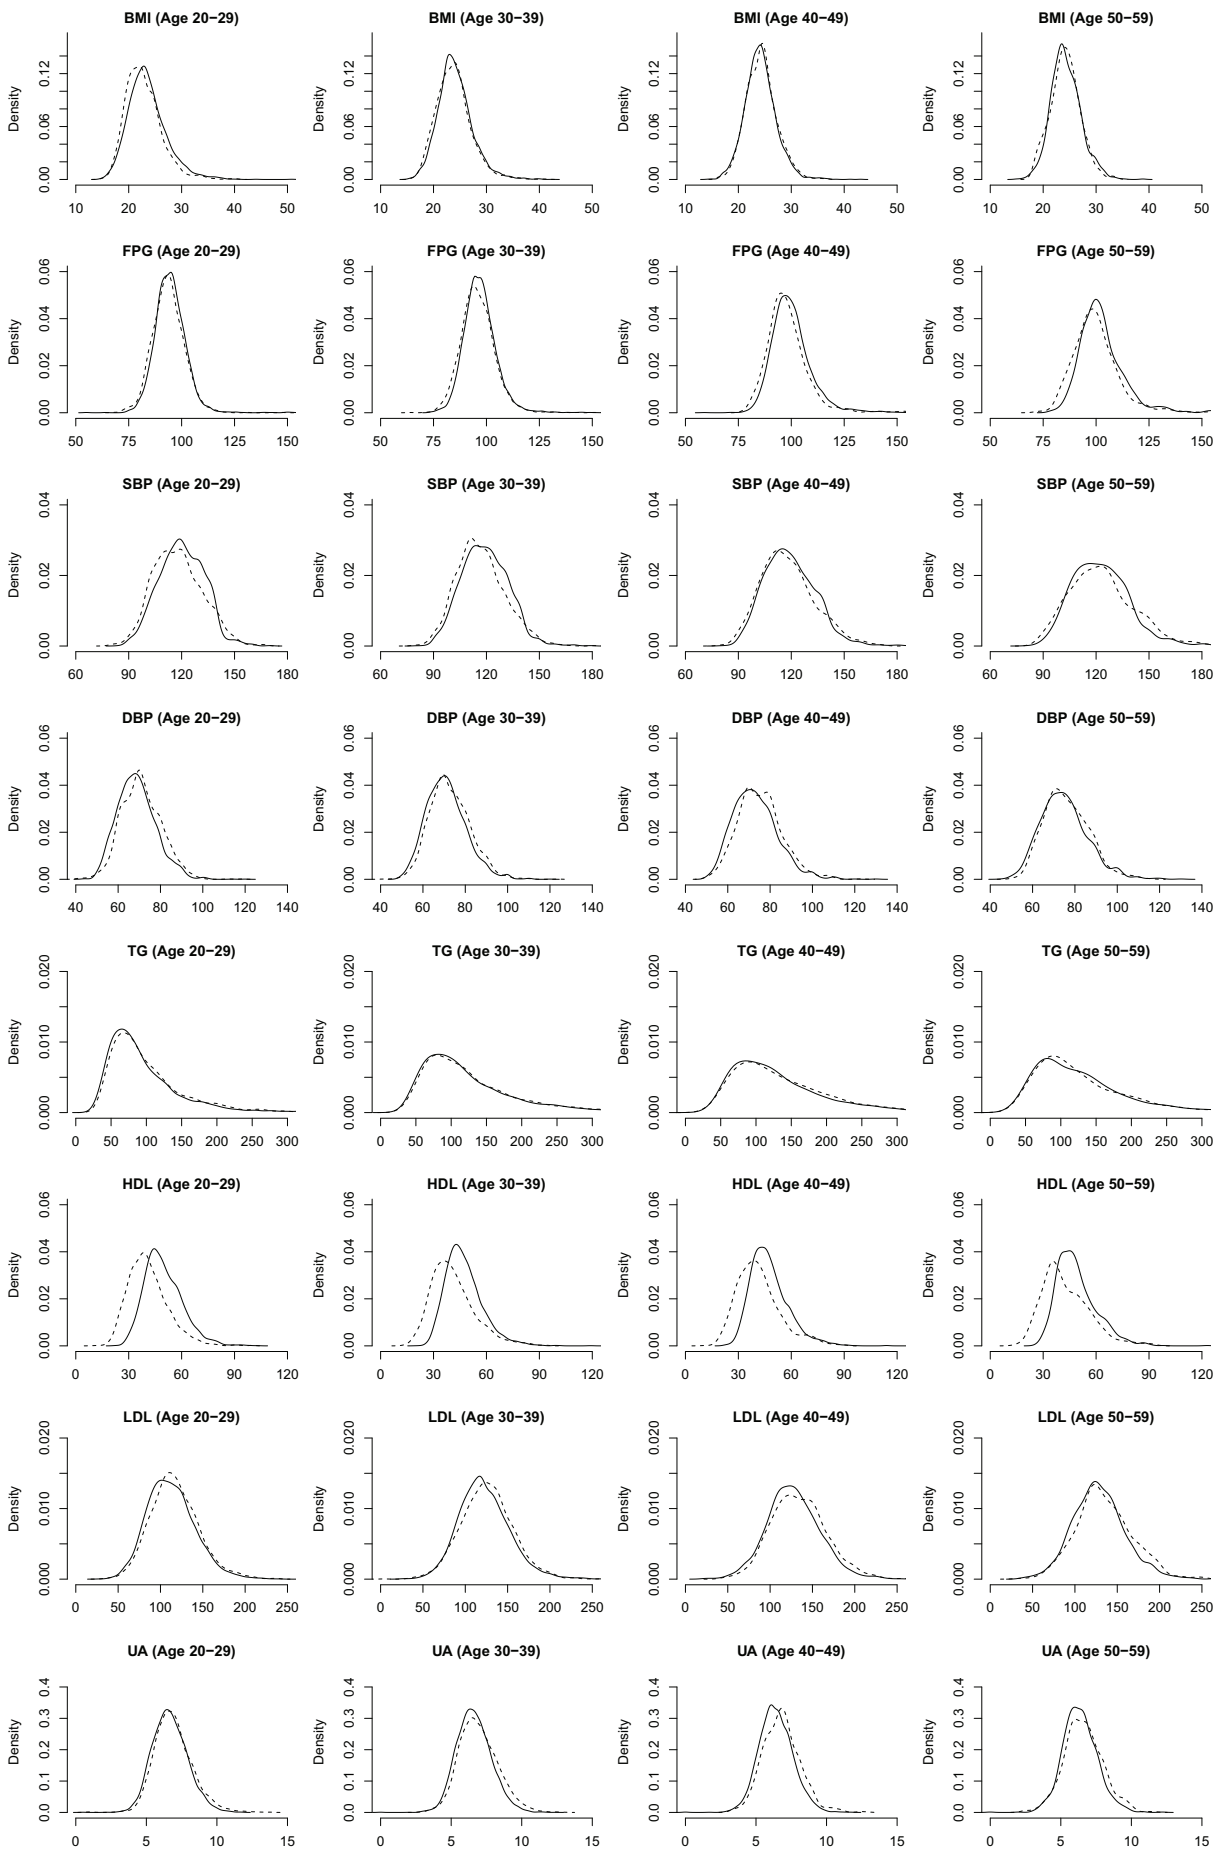

Supplement: MOESM2 [file 9432562]
